# Supplementary material for: Synergistic assembly of nanoparticles in smectic liquid crystals
Source: Royal Society of Chemistry journal article supplement (doi:10.1039/c5sm01458a), 2015-01-01
Supplement: c5sm01458a1.pdf [file c5sm01458a1.pdf]

## Supplementary Information

### Synergistic assembly of nanoparticles in smectic liquid crystals

Apiradee Honglawan,<sup>[a]</sup> Dae Seok Kim<sup>[b]</sup>, Daniel Beller,<sup>[c],†</sup> Dong Ki Yoon<sup>[b]</sup>, Mohamed A. Gharbi,<sup>[a,c,d]</sup> Kathleen J. Stebe,<sup>[a]</sup> Randall D. Kamien<sup>[c]</sup> and Shu Yang\*<sup>[a,d]</sup>

<sup>a</sup>Department of Chemical and Biomolecular Engineering, University of Pennsylvania, Towne Building, 220 South 33rd Street, Philadelphia, PA 19104, USA

<sup>b</sup> Graduate School of Nanoscience and Technology, KAIST, 291 Daehak-ro, Yuseong-gu, Daejeon 305-701, Republic of Korea

<sup>c</sup>Department of Physics and Astronomy, University of Pennsylvania, 209 South 33rd Street, Philadelphia, PA 19104, USA

<sup>d</sup>Department of Materials Science and Engineering, 3231 Walnut Street, University of Pennsylvania, Philadelphia, PA 19104, USA

<sup>†</sup>Current address: School of Engineering and Applied Sciences, Harvard University, 29 Oxford Street, Cambridge, MA 02138, USA

\*Corresponding author: Shu Yang ([shuyang@seas.upenn.edu](mailto:shuyang@seas.upenn.edu)), 215-898-9645

**Video S1.** *In situ* observation of the mixture of F-SiO<sub>2</sub> NP (100 nm)/F-LC cooled from isotropic phase (200 °C) to SmA phase (114 °C) under polarized optical microscope (POM), revealing a gradual transformation from an array of TFCDs to intermediate states of mixed TFCDs and fan textures to eventually fan textures.
